# Supplementary material for: Increased activity in frontal motor cortex compensates impaired speech perception in older adults
Source: PubMed Central journal article supplement (PMC4974649; doi:10.1038/ncomms12241), 2016-08-02
Supplement: ncomms12241-s1.pdf [file ncomms12241-s1.pdf]

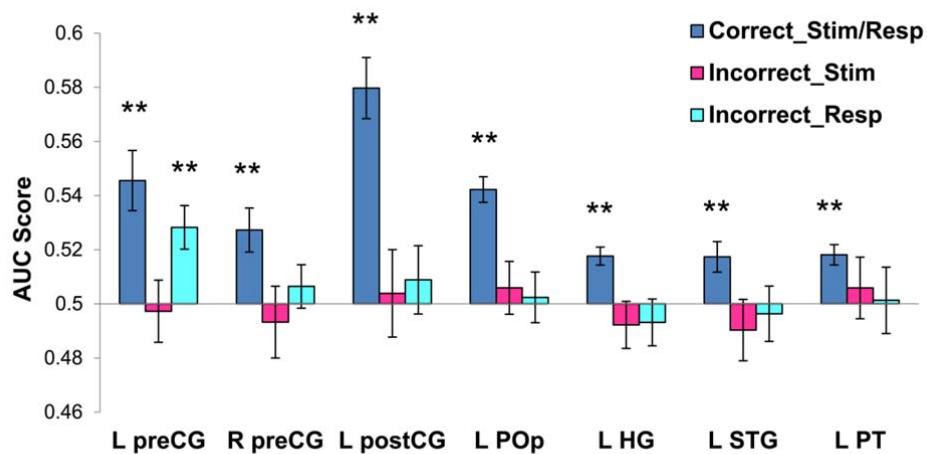

1

2

3 **Supplementary Figure 1.** Classification performance on stimulus or response  
 4 patterns in young adults. Blue bars show classification performance on stimulus or  
 5 response patterns using all the correct trials; red bars show classification performance  
 6 on stimulus patterns using all the incorrect trials; green bars show classification  
 7 performance on response patterns using all the incorrect trials. Note that the  
 8 classifications based on stimuli or responses were the same for correct trials. \*\*  $p <$   
 9 0.01 by one-sample t tests. HG, Heschl's gyrus; POp, pars opercularis; postCG,  
 10 postcentral gyrus; preCG, precentral gyrus; PT, planum temporale; STG, superior  
 11 temporal gyrus.

12
